# Supplementary material for: Computing MicroRNA-Gene Interaction Networks in Pan-cancer Using MiRDriver
Source: Research Square preprint supplement (doi:10.21203/rs.3.rs-1101651/v1), 2021-12-06
Supplement: Supplementary file 2 [file e40b1b5fcf5b5257511f8853.xlsx]

## Sheet: Sheet1
Supplemental Table S1
Hypergeometric test with the selected targets for each miRNA in ground truth data of known targets.
	Description of columns
	miRNA: No. of. Computed miRNAs
	universe: No. of. Input Genes in LASSO
	computed: No. of. Computed Targets
	known: No. of. Known Targets in ground truth
	overlap: No. of. Overlap between Known Targets and Computed Targets
	pvalue: Hypergeometric p-value

## Sheet: ACC.xlsx
	ACC
miRNA	universe	computed	known	overlap	pvalue
hsa-mir-1538	4248	72	1	0	1
hsa-mir-1305	4248	2	5	0	1
hsa-mir-185	4248	2	123	0	1
hsa-mir-1306	4248	1	49	0	1
hsa-mir-4786	4248	21	9	0	1
hsa-mir-149	4248	15	152	2	0.0985264683913708
hsa-mir-34b	4248	4	42	0	1
hsa-mir-34c	4248	1	139	0	1
hsa-mir-148b	4248	5	176	1	0.190769791958822
hsa-mir-1228	4248	15	9	0	1
hsa-mir-6758	4248	13	14	0	1
hsa-mir-616	4248	21	18	1	0.0855048832941032
hsa-mir-26a-2	4248	10	3	0	1
hsa-mir-6502	4248	14	6	0	1
hsa-mir-5010	4248	7	8	0	1
hsa-mir-6781	4248	3	8	0	1
hsa-mir-6782	4248	1	5	0	1
hsa-mir-6783	4248	2	9	0	1
hsa-mir-6784	4248	5	0	0	1
hsa-mir-580	4248	2	6	0	1
hsa-mir-6880	4248	19	13	1	0.0566879018738661
hsa-mir-6723	4248	2	1	0	1
hsa-mir-200b	4248	3	95	0	1
hsa-mir-200a	4248	1	75	0	1
hsa-mir-429	4248	1	94	0	1
hsa-mir-6726	4248	1	2	0	1
hsa-mir-6808	4248	1	13	0	1
hsa-mir-34a	4248	5	136	0	1
hsa-mir-4632	4248	2	1	0	1

## Sheet: BLCA.xlsx
	BLCA
miRNA	universe	computed	known	overlap	pvalue
hsa-mir-30e	5347	4	109	0	1
hsa-mir-30c-1	5347	2	7	0	1
hsa-mir-943	5347	10	0	0	1
hsa-mir-4647	5347	8	1	0	1
hsa-mir-3920	5347	7	0	0	1
hsa-mir-4728	5347	1	10	0	1
hsa-mir-6510	5347	5	2	0	1
hsa-mir-3064	5347	3	23	0	1
hsa-mir-4524a	5347	2	5	0	1
hsa-mir-3193	5347	1	1	0	1
hsa-mir-4755	5347	1	5	0	1
hsa-mir-6731	5347	7	9	0	1
hsa-mir-3917	5347	5	1	0	1
hsa-mir-1976	5347	12	8	0	1
hsa-mir-876	5347	11	68	0	1
hsa-mir-873	5347	5	68	2	0.00155483596684106
hsa-mir-885	5347	7	2	0	1
hsa-mir-4791	5347	4	0	0	1
hsa-mir-486	5347	19	26	2	0.00369554590437241
hsa-mir-5699	5347	2	6	0	1
hsa-mir-7113	5347	2	8	0	1
hsa-mir-4691	5347	3	9	0	1
hsa-mir-548k	5347	6	2	0	1
hsa-mir-3664	5347	3	5	0	1
hsa-mir-6754	5347	1	4	0	1
hsa-mir-139	5347	4	52	0	1
hsa-mir-708	5347	9	47	0	1
hsa-mir-5579	5347	9	2	0	1
hsa-mir-6502	5347	5	4	0	1
hsa-mir-3613	5347	15	8	1	0.0222377870749596
hsa-mir-16-1	5347	21	1	0	1
hsa-mir-15a	5347	9	98	1	0.15346903647361
hsa-mir-185	5347	1	38	1	0.00710678885356264
hsa-mir-3618	5347	1	0	0	1
hsa-mir-1306	5347	2	18	0	1
hsa-mir-301b	5347	3	35	0	1
hsa-mir-5571	5347	2	1	0	1
hsa-mir-3653	5347	8	23	0	1
hsa-mir-6818	5347	10	13	0	1
hsa-mir-3200	5347	10	1	0	1
hsa-mir-5703	5347	4	1	0	1
hsa-mir-4443	5347	2	0	0	1
hsa-mir-2115	5347	1	0	0	1
hsa-mir-3136	5347	2	0	0	1
hsa-mir-1284	5347	1	0	0	1
hsa-mir-3140	5347	1	2	0	1
hsa-mir-1305	5347	1	0	0	1
hsa-mir-581	5347	2	0	0	1
hsa-mir-449a	5347	1	19	0	1
hsa-mir-449b	5347	1	12	0	1
hsa-mir-218-2	5347	1	1	0	1
hsa-mir-5003	5347	1	5	0	1
hsa-mir-1229	5347	2	4	0	1
hsa-mir-4660	5347	1	1	0	1
hsa-mir-597	5347	3	0	0	1
hsa-mir-491	5347	2	58	0	1
hsa-mir-31	5347	2	51	0	1
hsa-mir-210	5347	1	5	0	1
hsa-mir-675	5347	1	0	0	1
hsa-mir-4491	5347	2	0	0	1
hsa-mir-34b	5347	1	6	0	1
hsa-mir-125b-1	5347	3	0	0	1
hsa-let-7a-2	5347	1	0	0	1
hsa-mir-100	5347	2	6	0	1
hsa-mir-1247	5347	5	5	0	1
hsa-mir-203b	5347	3	1	0	1
hsa-mir-3942	5347	1	0	0	1
hsa-mir-627	5347	4	3	0	1
hsa-mir-4745	5347	4	0	0	1
hsa-mir-3187	5347	2	7	0	1
hsa-mir-1227	5347	3	1	0	1
hsa-mir-4746	5347	2	1	0	1
hsa-mir-6885	5347	3	0	0	1
hsa-mir-3940	5347	3	1	0	1
hsa-mir-3662	5347	29	6	0	1
hsa-mir-6503	5347	8	1	0	1
hsa-mir-935	5347	5	0	0	1
hsa-mir-6803	5347	1	1	0	1
hsa-mir-6805	5347	12	1	0	1
hsa-mir-744	5347	2	9	0	1
hsa-mir-1269b	5347	2	0	0	1
hsa-mir-4766	5347	1	6	0	1
hsa-mir-33a	5347	2	39	0	1
hsa-mir-378i	5347	2	12	0	1
hsa-mir-1249	5347	1	1	0	1
hsa-mir-4762	5347	2	2	0	1
hsa-let-7b	5347	1	35	0	1
hsa-mir-3667	5347	1	5	0	1
hsa-mir-4645	5347	1	3	0	1
hsa-mir-5683	5347	1	0	0	1
hsa-mir-3150b	5347	11	2	0	1
hsa-mir-7705	5347	1	0	0	1
hsa-mir-5680	5347	3	5	0	1
hsa-mir-3610	5347	1	0	0	1
hsa-mir-6844	5347	3	1	0	1
hsa-mir-4662a	5347	5	1	0	1
hsa-mir-4522	5347	3	2	0	1
hsa-mir-451a	5347	4	8	0	1
hsa-mir-144	5347	77	80	1	0.689367756218414
hsa-mir-4732	5347	3	0	0	1
hsa-mir-4523	5347	5	0	0	1
hsa-mir-423	5347	4	20	0	1
hsa-mir-4733	5347	4	4	0	1
hsa-mir-4724	5347	3	0	0	1
hsa-mir-193a	5347	3	57	0	1
hsa-mir-365b	5347	5	19	0	1
hsa-mir-632	5347	4	0	0	1
hsa-mir-3176	5347	2	2	0	1
hsa-mir-3177	5347	2	0	0	1
hsa-mir-3677	5347	1	0	0	1
hsa-mir-940	5347	2	2	0	1
hsa-mir-5698	5347	1	1	0	1
hsa-mir-92b	5347	1	3	0	1

## Sheet: BRCA.xlsx
	BRCA
miRNA	universe	computed	known	overlap	pvalue
hsa.let.7a.2	6484	1	0	0	1
hsa.let.7b	6484	6	34	1	0.0310643131270013
hsa.let.7c	6484	1	15	0	1
hsa.let.7g	6484	1	6	1	0.000925354719309102
hsa.mir.100	6484	1	0	0	1
hsa.mir.10a	6484	3	19	1	0.00876648338813413
hsa.mir.1224	6484	24	28	2	0.00468045352664558
hsa.mir.1226	6484	1	0	0	1
hsa.mir.1247	6484	3	0	0	1
hsa.mir.125b.1	6484	1	0	0	1
hsa.mir.125b.2	6484	3	0	0	1
hsa.mir.1266	6484	1	0	0	1
hsa.mir.127	6484	1	1	0	1
hsa.mir.1287	6484	1	0	0	1
hsa.mir.1291	6484	114	0	0	1
hsa.mir.1304	6484	2	0	0	1
hsa.mir.1343	6484	29	0	0	1
hsa.mir.138.1	6484	2	0	0	1
hsa.mir.139	6484	6	16	1	0.0147202804217758
hsa.mir.142	6484	10	29	1	0.0438658064476369
hsa.mir.146b	6484	1	2	0	1
hsa.mir.147b	6484	2	0	0	1
hsa.mir.151a	6484	4	3	0	1
hsa.mir.151b	6484	5	0	0	1
hsa.mir.152	6484	3	25	0	1
hsa.mir.15a	6484	1	7	1	0.00107958050586054
hsa.mir.16.1	6484	1	0	0	1
hsa.mir.191	6484	1	2	1	0.000308451573103108
hsa.mir.1910	6484	12	0	0	1
hsa.mir.192	6484	3	5	0	1
hsa.mir.203b	6484	2	0	0	1
hsa.mir.21	6484	7	22	1	0.0235211511278175
hsa.mir.210	6484	10	1	0	1
hsa.mir.2115	6484	3	0	0	1
hsa.mir.296	6484	1	8	1	0.00123380629241199
hsa.mir.299	6484	1	6	1	0.000925354719309102
hsa.mir.301a	6484	2	30	0	1
hsa.mir.3064	6484	2	15	0	1
hsa.mir.3065	6484	3	0	0	1
hsa.mir.30a	6484	2	4	0	1
hsa.mir.30b	6484	6	36	2	0.000443363987932552
hsa.mir.30d	6484	4	36	1	0.0220292945406828
hsa.mir.31	6484	19	33	3	0.000110122393020163
hsa.mir.3136	6484	6	0	0	1
hsa.mir.3150a	6484	2	0	0	1
hsa.mir.3150b	6484	9	0	0	1
hsa.mir.3173	6484	2	0	0	1
hsa.mir.3187	6484	3	0	0	1
hsa.mir.3190	6484	27	0	0	1
hsa.mir.3191	6484	45	0	0	1
hsa.mir.320a	6484	1	3	1	0.000462677359654551
hsa.mir.320e	6484	24	0	0	1
hsa.mir.326	6484	4	12	2	1.88023600841663e-05
hsa.mir.330	6484	42	73	6	6.29568850069511e-06
hsa.mir.337	6484	3	0	0	1
hsa.mir.338	6484	6	29	1	0.0265471380558903
hsa.mir.339	6484	75	27	2	0.0384582410749401
hsa.mir.342	6484	4	5	1	0.00308166190031556
hsa.mir.345	6484	4	3	1	0.00184985311326213
hsa.mir.34b	6484	1	1	0	1
hsa.mir.34c	6484	1	2	1	0.000308451573103108
hsa.mir.3610	6484	6	0	0	1
hsa.mir.3614	6484	4	0	0	1
hsa.mir.3615	6484	4	0	0	1
hsa.mir.3619	6484	3	19	1	0.00876648338813413
hsa.mir.3622a	6484	1	0	0	1
hsa.mir.3648	6484	2	0	0	1
hsa.mir.3664	6484	6	0	0	1
hsa.mir.3667	6484	11	0	0	1
hsa.mir.3678	6484	3	0	0	1
hsa.mir.3687	6484	1	0	0	1
hsa.mir.3691	6484	3	0	0	1
hsa.mir.376a.2	6484	1	0	0	1
hsa.mir.376c	6484	1	5	0	1
hsa.mir.378c	6484	1	1	0	1
hsa.mir.379	6484	3	3	0	1
hsa.mir.381	6484	3	8	1	0.00369742351433111
hsa.mir.382	6484	1	7	0	1
hsa.mir.383	6484	1	3	1	0.000462677359654551
hsa.mir.3940	6484	2	0	0	1
hsa.mir.3942	6484	1	0	0	1
hsa.mir.411	6484	1	3	0	1
hsa.mir.412	6484	1	0	0	1
hsa.mir.425	6484	2	7	0	1
hsa.mir.431	6484	2	4	1	0.00123352082126582
hsa.mir.432	6484	1	6	1	0.000925354719309102
hsa.mir.4326	6484	1	0	0	1
hsa.mir.4443	6484	2	0	0	1
hsa.mir.4453	6484	4	0	0	1
hsa.mir.4454	6484	2	0	0	1
hsa.mir.4466	6484	1	0	0	1
hsa.mir.4491	6484	3	0	0	1
hsa.mir.4492	6484	1	0	0	1
hsa.mir.449a	6484	26	133	1	0.417199794193933
hsa.mir.449b	6484	24	93	5	1.86668305976467e-05
hsa.mir.4510	6484	2	0	0	1
hsa.mir.4522	6484	7	0	0	1
hsa.mir.4532	6484	1	0	0	1
hsa.mir.454	6484	4	30	0	1
hsa.mir.4645	6484	2	0	0	1
hsa.mir.4661	6484	6	0	0	1
hsa.mir.4662a	6484	3	0	0	1
hsa.mir.4664	6484	4	0	0	1
hsa.mir.4709	6484	2	0	0	1
hsa.mir.4714	6484	4	0	0	1
hsa.mir.4726	6484	1	0	0	1
hsa.mir.4728	6484	8	0	0	1
hsa.mir.4745	6484	1	0	0	1
hsa.mir.4746	6484	13	0	0	1
hsa.mir.4758	6484	3	0	0	1
hsa.mir.4762	6484	7	0	0	1
hsa.mir.4763	6484	5	0	0	1
hsa.mir.4787	6484	5	0	0	1
hsa.mir.485	6484	1	8	1	0.00123380629241199
hsa.mir.487b	6484	1	0	0	1
hsa.mir.493	6484	1	7	1	0.00107958050586054
hsa.mir.494	6484	1	6	1	0.000925354719309102
hsa.mir.495	6484	1	9	1	0.00138803207896365
hsa.mir.496	6484	1	6	0	1
hsa.mir.5010	6484	1	0	0	1
hsa.mir.522	6484	2	0	0	1
hsa.mir.526b	6484	1	3	0	1
hsa.mir.543	6484	1	6	1	0.000925354719309102
hsa.mir.548k	6484	7	0	0	1
hsa.mir.548t	6484	1	0	0	1
hsa.mir.548v	6484	1	0	0	1
hsa.mir.5579	6484	4	0	0	1
hsa.mir.5680	6484	2	0	0	1
hsa.mir.5683	6484	2	0	0	1
hsa.mir.5687	6484	60	0	0	1
hsa.mir.5691	6484	2	0	0	1
hsa.mir.5694	6484	5	0	0	1
hsa.mir.5708	6484	4	0	0	1
hsa.mir.581	6484	85	0	0	1
hsa.mir.582	6484	162	59	8	9.58196046722388e-05
hsa.mir.598	6484	1	0	0	1
hsa.mir.625	6484	2	0	0	1
hsa.mir.627	6484	1	0	0	1
hsa.mir.628	6484	1	0	0	1
hsa.mir.636	6484	3	0	0	1
hsa.mir.642a	6484	52	0	0	1
hsa.mir.6502	6484	2	0	0	1
hsa.mir.6510	6484	7	0	0	1
hsa.mir.6514	6484	5	0	0	1
hsa.mir.6516	6484	4	0	0	1
hsa.mir.654	6484	1	0	0	1
hsa.mir.656	6484	2	0	0	1
hsa.mir.671	6484	5	0	0	1
hsa.mir.6715a	6484	1	0	0	1
hsa.mir.6716	6484	1	0	0	1
hsa.mir.6720	6484	5	0	0	1
hsa.mir.6747	6484	1	0	0	1
hsa.mir.6748	6484	5	0	0	1
hsa.mir.675	6484	3	0	0	1
hsa.mir.6761	6484	11	0	0	1
hsa.mir.6762	6484	3	0	0	1
hsa.mir.6764	6484	1	0	0	1
hsa.mir.6781	6484	2	0	0	1
hsa.mir.6783	6484	4	0	0	1
hsa.mir.6803	6484	1	0	0	1
hsa.mir.6842	6484	1	0	0	1
hsa.mir.6843	6484	1	0	0	1
hsa.mir.6844	6484	3	0	0	1
hsa.mir.6860	6484	8	0	0	1
hsa.mir.6868	6484	1	0	0	1
hsa.mir.6879	6484	4	0	0	1
hsa.mir.708	6484	3	6	1	0.00277392356473949
hsa.mir.7155	6484	2	0	0	1
hsa.mir.744	6484	41	5	1	0.0312284828337227
hsa.mir.758	6484	1	5	1	0.000771128932757659
hsa.mir.769	6484	52	0	0	1
hsa.mir.7705	6484	4	0	0	1
hsa.mir.7854	6484	11	0	0	1
hsa.mir.8072	6484	4	0	0	1
hsa.mir.937	6484	5	0	0	1
hsa.mir.99a	6484	1	1	0	1

## Sheet: CESC.xlsx
	CESC
miRNA	universe	computed	known	overlap	pvalue
hsa-mir-2355	4472	15	4	0	1
hsa-mir-7845	4472	4	3	0	1
hsa-mir-4775	4472	10	4	0	1
hsa-mir-6513	4472	4	9	0	1
hsa-mir-6810	4472	15	10	1	0.0330730532373545
hsa-mir-26b	4472	17	150	4	0.00205744853802847
hsa-mir-375	4472	23	89	0	1
hsa-mir-5703	4472	16	2	1	0.00714363164884102
hsa-mir-4777	4472	15	1	0	1
hsa-mir-5001	4472	20	5	0	1
hsa-mir-4786	4472	4	6	0	1
hsa-mir-149	4472	21	109	3	0.0136092013606996
hsa-mir-4665	4472	8	3	0	1
hsa-mir-1343	4472	32	13	0	1
hsa-mir-6510	4472	47	3	0	1
hsa-mir-5684	4472	14	0	0	1
hsa-mir-6802	4472	2	3	0	1
hsa-mir-3193	4472	3	1	0	1
hsa-mir-499a	4472	21	44	2	0.0176472977868491
hsa-mir-137	4472	2	59	0	1
hsa-mir-197	4472	1	24	0	1
hsa-mir-942	4472	2	5	0	1
hsa-mir-877	4472	7	18	0	1
hsa-mir-3920	4472	3	2	0	1
hsa-mir-4491	4472	10	1	0	1
hsa-mir-34b	4472	5	28	1	0.0309299890034499
hsa-mir-34c	4472	2	105	0	1
hsa-mir-6716	4472	4	2	0	1
hsa-mir-4492	4472	3	1	0	1
hsa-mir-125b-1	4472	8	0	0	1
hsa-let-7a-2	4472	6	0	0	1
hsa-mir-100	4472	10	18	0	1
hsa-mir-548k	4472	4	3	0	1
hsa-mir-3664	4472	6	10	0	1
hsa-mir-3136	4472	1	1	0	1
hsa-mir-138-2	4472	10	1	1	0.00223613595706618
hsa-mir-3667	4472	7	7	0	1
hsa-mir-6821	4472	4	10	0	1
hsa-mir-10b	4472	19	72	1	0.265834031177997
hsa-mir-7704	4472	4	2	0	1
hsa-mir-1246	4472	17	0	0	1
hsa-mir-1179	4472	2	1	0	1
hsa-mir-7-2	4472	3	0	0	1
hsa-mir-3174	4472	8	0	0	1
hsa-mir-4714	4472	3	4	0	1
hsa-mir-30b	4472	1	55	0	1
hsa-mir-30d	4472	1	48	0	1
hsa-mir-4664	4472	1	0	0	1
hsa-mir-937	4472	1	1	0	1
hsa-mir-6726	4472	1	0	0	1
hsa-mir-6808	4472	2	0	0	1
hsa-mir-551a	4472	1	0	0	1
hsa-mir-6730	4472	2	0	0	1
hsa-mir-4466	4472	1	0	0	1
hsa-mir-346	4472	1	32	0	1
hsa-mir-136	4472	1	15	0	1
hsa-mir-381	4472	1	19	0	1
hsa-mir-3615	4472	2	1	0	1
hsa-mir-3678	4472	3	0	0	1
hsa-mir-4738	4472	2	3	0	1
hsa-mir-6868	4472	4	8	0	1
hsa-mir-636	4472	2	2	0	1
hsa-mir-6516	4472	2	12	0	1
hsa-mir-1268b	4472	3	2	0	1
hsa-mir-3065	4472	3	1	0	1
hsa-mir-4525	4472	4	2	0	1
hsa-mir-6737	4472	1	0	0	1
hsa-mir-92b	4472	1	4	0	1
hsa-mir-15b	4472	1	24	0	1
hsa-mir-551b	4472	2	4	0	1
hsa-mir-1224	4472	1	8	0	1
hsa-mir-1248	4472	2	0	0	1
hsa-mir-624	4472	6	7	0	1
hsa-mir-3064	4472	1	22	0	1
hsa-mir-147b	4472	3	0	0	1
hsa-mir-4713	4472	1	4	0	1
hsa-mir-628	4472	2	2	0	1

## Sheet: DLBC.xlsx
	DLBC
miRNA	universe	computed	known	overlap	pvalue
hsa-mir-346	3644	42	16	4	2.51161814752055e-05
hsa-mir-627	3644	5	6	0	1
hsa-mir-147b	3644	2	1	0	1
hsa-mir-570	3644	11	8	0	1
hsa-mir-4797	3644	2	6	0	1
hsa-mir-6723	3644	23	1	0	1
hsa-mir-200b	3644	53	142	9	0.000164738251749461
hsa-mir-200a	3644	32	119	6	0.000482948405906286
hsa-mir-429	3644	36	142	5	0.0119123476397096
hsa-mir-6726	3644	9	4	0	1
hsa-mir-6727	3644	7	18	0	1
hsa-mir-6808	3644	9	12	0	1
hsa-mir-551a	3644	26	12	1	0.0824585678529459
hsa-mir-6844	3644	13	2	1	0.00712326513443362
hsa-mir-4662a	3644	20	7	0	1
hsa-mir-6802	3644	3	1	0	1
hsa-mir-6803	3644	7	1	0	1
hsa-mir-6805	3644	11	4	0	1
hsa-mir-4784	3644	2	2	0	1
hsa-mir-128-1	3644	2	0	0	1
hsa-mir-6891	3644	5	3	0	1
hsa-mir-6833	3644	3	6	0	1
hsa-mir-4677	3644	4	6	0	1
hsa-mir-3916	3644	7	0	0	1
hsa-mir-1226	3644	16	2	0	1
hsa-mir-4443	3644	3	3	0	1
hsa-mir-2115	3644	5	7	0	1
hsa-mir-425	3644	11	41	0	1
hsa-mir-191	3644	9	22	0	1

## Sheet: ESCA.xlsx
	ESCA
miRNA	universe	computed	known	overlap	pvalue
hsa-mir-30e	4942	8	107	1	0.160742193855352
hsa-mir-30c-1	4942	6	9	0	1
hsa-mir-598	4942	4	0	0	1
hsa-mir-486	4942	3	22	0	1
hsa-mir-6502	4942	16	2	0	1
hsa-mir-5094	4942	15	0	0	1
hsa-mir-548t	4942	3	3	0	1
hsa-mir-1305	4942	3	2	0	1
hsa-mir-3648	4942	7	0	0	1
hsa-mir-3687	4942	3	0	0	1
hsa-let-7c	4942	3	55	0	1
hsa-mir-6501	4942	19	4	0	1
hsa-mir-2355	4942	3	1	0	1
hsa-mir-4775	4942	6	3	0	1
hsa-mir-6513	4942	10	7	0	1
hsa-mir-26b	4942	5	51	0	1
hsa-mir-375	4942	6	20	0	1
hsa-mir-3131	4942	5	0	0	1
hsa-mir-5703	4942	10	0	0	1
hsa-mir-4777	4942	7	0	0	1
hsa-mir-5001	4942	11	2	0	1
hsa-mir-4786	4942	4	1	0	1
hsa-mir-149	4942	4	30	0	1
hsa-mir-1343	4942	15	5	0	1
hsa-mir-4676	4942	17	24	0	1
hsa-mir-4680	4942	7	6	0	1
hsa-mir-3662	4942	18	5	0	1
hsa-mir-6720	4942	18	5	0	1
hsa-mir-4645	4942	10	0	0	1
hsa-mir-3691	4942	7	1	0	1
hsa-mir-5683	4942	8	0	0	1
hsa-mir-4491	4942	1	1	0	1
hsa-mir-34b	4942	1	4	0	1
hsa-mir-34c	4942	6	14	0	1
hsa-mir-6716	4942	1	0	0	1
hsa-let-7a-2	4942	1	0	0	1
hsa-mir-100	4942	9	2	0	1
hsa-mir-581	4942	41	2	0	1
hsa-mir-449a	4942	42	119	3	0.0793364233078917
hsa-mir-5687	4942	52	0	0	1
hsa-mir-582	4942	26	61	0	1
hsa-mir-339	4942	11	25	0	1
hsa-mir-3610	4942	2	0	0	1
hsa-mir-6844	4942	4	1	0	1
hsa-mir-4662a	4942	4	0	0	1
hsa-mir-30d	4942	2	25	0	1
hsa-mir-151a	4942	1	6	0	1
hsa-mir-4664	4942	1	0	0	1
hsa-mir-937	4942	1	0	0	1
hsa-mir-6852	4942	36	6	0	1
hsa-mir-4691	4942	8	3	0	1
hsa-mir-3664	4942	2	5	0	1
hsa-mir-139	4942	7	15	0	1
hsa-mir-6510	4942	2	0	0	1
hsa-mir-5010	4942	2	5	0	1
hsa-mir-6781	4942	1	0	0	1
hsa-mir-6516	4942	11	13	0	1
hsa-mir-6728	4942	1	2	0	1
hsa-mir-34a	4942	13	76	3	0.00089484210702905
hsa-mir-378f	4942	1	1	0	1
hsa-mir-3136	4942	3	3	0	1
hsa-mir-1284	4942	6	0	0	1
hsa-mir-4473	4942	2	0	0	1
hsa-mir-491	4942	7	30	1	0.041751741802404
hsa-mir-31	4942	3	23	0	1
hsa-mir-346	4942	14	30	0	1
hsa-mir-210	4942	6	30	0	1
hsa-mir-675	4942	10	1	0	1
hsa-mir-483	4942	8	12	1	0.0192745841448335
hsa-mir-3176	4942	7	3	0	1
hsa-mir-4529	4942	4	2	0	1
hsa-mir-942	4942	2	0	0	1
hsa-mir-3187	4942	2	1	0	1
hsa-mir-3940	4942	2	0	0	1
hsa-mir-4999	4942	2	0	0	1
hsa-mir-653	4942	1	11	0	1
hsa-mir-489	4942	1	9	0	1
hsa-mir-25	4942	1	22	0	1
hsa-mir-93	4942	2	25	0	1
hsa-mir-106b	4942	1	26	0	1
hsa-mir-4658	4942	3	0	0	1
hsa-mir-548o	4942	2	0	0	1
hsa-mir-5090	4942	2	2	0	1

## Sheet: HNSC.xlsx
	HNSC
miRNA	universe	computed	known	overlap	pvalue
hsa-mir-486	2529	1	6	0	1
hsa-mir-3667	2529	12	6	0	1
hsa-mir-3127	2529	9	1	0	1
hsa-mir-4714	2529	5	3	0	1
hsa-mir-4522	2529	6	0	0	1
hsa-mir-1343	2529	8	2	0	1
hsa-mir-6502	2529	2	0	0	1
hsa-mir-6510	2529	37	1	0	1
hsa-mir-6870	2529	4	1	0	1
hsa-mir-3193	2529	1	1	0	1
hsa-mir-185	2529	2	21	0	1
hsa-mir-1306	2529	1	13	0	1
hsa-mir-6720	2529	11	3	0	1
hsa-mir-5699	2529	5	2	0	1
hsa-mir-346	2529	8	11	1	0.034318026775106
hsa-mir-210	2529	6	9	0	1
hsa-mir-675	2529	3	1	0	1
hsa-mir-483	2529	1	2	0	1
hsa-mir-4525	2529	9	1	0	1
hsa-mir-10b	2529	5	12	0	1
hsa-mir-7704	2529	3	0	0	1
hsa-mir-6512	2529	7	1	0	1
hsa-mir-1258	2529	4	0	0	1
hsa-mir-561	2529	7	2	0	1
hsa-mir-3129	2529	6	13	0	1
hsa-mir-2355	2529	3	1	0	1
hsa-mir-7845	2529	3	0	0	1
hsa-mir-4775	2529	5	1	0	1
hsa-mir-6513	2529	8	3	0	1
hsa-mir-26b	2529	8	25	1	0.0765022119795193
hsa-mir-375	2529	9	16	0	1
hsa-mir-5703	2529	3	0	0	1
hsa-mir-4777	2529	2	1	0	1
hsa-mir-5001	2529	4	2	0	1
hsa-mir-4786	2529	4	1	0	1
hsa-mir-149	2529	3	12	0	1
hsa-mir-208b	2529	3	1	0	1
hsa-mir-342	2529	1	2	0	1
hsa-mir-345	2529	2	0	0	1
hsa-mir-379	2529	1	1	0	1
hsa-mir-411	2529	1	2	0	1
hsa-mir-654	2529	1	0	0	1
hsa-mir-655	2529	1	1	0	1
hsa-mir-382	2529	1	2	0	1
hsa-mir-134	2529	1	2	0	1
hsa-mir-323b	2529	1	2	0	1
hsa-mir-496	2529	1	2	0	1
hsa-mir-369	2529	1	2	0	1
hsa-mir-203b	2529	1	0	0	1
hsa-mir-339	2529	6	14	1	0.0327903954872707
hsa-mir-6718	2529	7	0	0	1
hsa-mir-6755	2529	3	0	0	1
hsa-mir-4745	2529	2	0	0	1
hsa-mir-3187	2529	1	4	0	1
hsa-mir-1227	2529	2	0	0	1
hsa-mir-4746	2529	1	0	0	1
hsa-mir-6885	2529	1	1	0	1
hsa-mir-4999	2529	1	0	0	1
hsa-mir-4473	2529	3	0	0	1
hsa-mir-873	2529	1	10	0	1
hsa-mir-3140	2529	1	2	0	1
hsa-mir-4453	2529	4	2	0	1
hsa-mir-548t	2529	1	2	0	1
hsa-mir-1305	2529	1	3	0	1
hsa-mir-6844	2529	1	0	0	1
hsa-mir-30d	2529	1	0	0	1
hsa-mir-151a	2529	1	0	0	1

## Sheet: LAML.xlsx
	LAML
miRNA	universe	computed	known	overlap	pvalue
hsa-mir-4724	2878	53	6	0	1
hsa-mir-193a	2878	89	114	5	0.275904532397438
hsa-mir-365b	2878	70	52	1	0.725287064699993
hsa-mir-632	2878	43	2	0	1
hsa-mir-3136	2878	56	5	0	1
hsa-mir-1284	2878	54	1	0	1
hsa-mir-129-1	2878	10	32	0	1
hsa-mir-182	2878	9	105	1	0.284638430061615
hsa-mir-96	2878	33	79	7	2.16009122817207e-05
hsa-mir-183	2878	24	54	3	0.00956545685999314
hsa-mir-335	2878	5	140	0	1
hsa-mir-29a	2878	11	85	0	1
hsa-mir-29b-1	2878	18	1	0	1
hsa-mir-3654	2878	3	1	0	1
hsa-mir-6509	2878	12	5	0	1
hsa-mir-6892	2878	6	10	0	1
hsa-mir-671	2878	7	0	0	1
hsa-mir-22	2878	22	103	3	0.0418303576164561
hsa-mir-132	2878	22	73	0	1
hsa-mir-212	2878	28	86	2	0.203165020783188

## Sheet: KIRC.xlsx
	KIRC
miRNA	universe	computed	known	overlap	pvalue
hsa-mir-4728	2998	122	15	3	0.0209041471708487
hsa-mir-31	2998	28	36	2	0.0435881552730447
hsa-mir-346	2998	35	29	1	0.289765970761575
hsa-mir-190b	2998	3	6	0	1
hsa-mir-92b	2998	6	5	0	1
hsa-mir-765	2998	3	0	0	1
hsa-mir-5187	2998	3	0	0	1
hsa-mir-2277	2998	7	2	0	1
hsa-mir-551b	2998	44	7	0	1
hsa-mir-215	2998	5	0	0	1
hsa-mir-664a	2998	5	0	0	1
hsa-mir-4742	2998	10	0	0	1
hsa-mir-1537	2998	17	0	0	1
hsa-mir-4677	2998	14	1	0	1
hsa-mir-2355	2998	4	0	0	1
hsa-mir-26b	2998	2	11	0	1
hsa-mir-375	2998	6	1	0	1
hsa-mir-3131	2998	3	0	0	1
hsa-mir-4777	2998	1	1	0	1
hsa-mir-5001	2998	30	0	0	1
hsa-mir-4786	2998	6	0	0	1
hsa-mir-149	2998	1	5	0	1
hsa-mir-4709	2998	3	0	0	1

[truncated: 9 more sheets: LGG.xlsx, LIHC.xlsx, LUAD.xlsx, LUSC.xlsx, OV.xlsx, PAAD.xlsx, PRAD.xlsx, THCA.xlsx, UCEC.xlsx]
