# Supplementary material for: Computing MicroRNA-Gene Interaction Networks in Pan-cancer Using MiRDriver
Source: Research Square preprint supplement (doi:10.21203/rs.3.rs-1101651/v1), 2021-12-06
Supplement: Supplementary file 3 [file 0bdbcb2be431a6376f7d2a62.xlsx]

## Sheet: Sheet1
Supplemental Table S7
OncoScore citation frequencies for high-degree genes in each cancer type.

## Sheet: Oncoscore
OncoScore citation frequencies for high-degree genes in each cancer type.
Cancer	High-degree Gene	Total Citations	Cancer Related Citation
ACC	CA12	166	93
ACC	GAPLINC	21	20
ACC	MAGED1	115	109
ACC	MTCO1P17	0	0
ACC	RS1	823	86
ACC	SPRR2D	26	8
BLCA	BTNL3	14	8
BLCA	C8orf34-AS1	0	0
BLCA	CYP4F8	17	3
BLCA	EML5	11	1
BLCA	HNF1A-AS1	39	36
BLCA	MIR1205	1	1
BLCA	NAA11	6	5
BLCA	NOL4	13	8
BLCA	OR10H5	1	1
BLCA	ORM1	209	52
BLCA	PCDHGB8P	0	0
BLCA	PDZD3	2	1
BLCA	PURG	39	5
BLCA	RAC1P9	0	0
BLCA	RANBP3L	6	2
BRCA	ABCA8	44	24
BRCA	ACKR1	297	69
BRCA	ADH1A	63	24
BRCA	ADH1B	569	213
BRCA	ALDH1L1-AS2	0	0
BRCA	AQP7P1	0	0
BRCA	ARHGAP31-AS1	0	0
BRCA	BTG2	398	326
BRCA	CABCOCO1	1	0
BRCA	CCDC60	2	1
BRCA	CCK	19869	7294
BRCA	CCKAR	111	21
BRCA	CFAP43	17	1
BRCA	CHP2	52	17
BRCA	CLIC6	22	8
BRCA	CNR2	615	106
BRCA	COX6CP1	1	0
BRCA	CYP4F24P	0	0
BRCA	DRD1	641	55
BRCA	EGR3	308	101
BRCA	ERVH480	3	2
BRCA	FABP4	1708	347
BRCA	FAM3B	50	29
BRCA	FAM83A	41	41
BRCA	FCER1A	172	45
BRCA	FCGBP	64	33
BRCA	HSD17B13	54	18
BRCA	IGFN1	11	4
BRCA	IGHV7-27	0	0
BRCA	KCNJ11	853	28
BRCA	LCE1A	0	0
BRCA	LCE1E	1	0
BRCA	LINC01781	0	0
BRCA	LINC01879	0	0
BRCA	LINC02086	1	1
BRCA	LINC02321	0	0
BRCA	LINC02489	0	0
BRCA	LNCPRESS1	1	1
BRCA	MEX3A	16	12
BRCA	MIR4429	0	0
BRCA	MMP1	2268	956
BRCA	MMRN1	28	10
BRCA	NAT1	789	456
BRCA	NOSTRIN	45	10
BRCA	NR0B2	112	41
BRCA	NTRK2	515	163
BRCA	PALM2	11	5
BRCA	PDZRN4	9	5
BRCA	PHYHD1	7	2
BRCA	PLAC9P1	0	0
BRCA	RN7SL28P	0	0
BRCA	RNA5SP354	0	0
BRCA	SCDP1	1	0
BRCA	SCN2B	74	4
BRCA	SCN7A	52	13
BRCA	SERPINA1	692	143
BRCA	SLC7A3	23	6
BRCA	SPPL2C	12	0
BRCA	STMND1	1	0
BRCA	TINCR	68	45
BRCA	TNXB	124	25
BRCA	ZNF280A	4	4
CESC	ACOX2	45	16
CESC	B3GALT2	4	1
CESC	C10orf90	11	8
CESC	C11orf86	1	1
CESC	CCL18	585	216
CESC	CHORDC2P	1	0
CESC	CPA1	149	21
CESC	EMX2OS	8	6
CESC	FBXL7	26	12
CESC	GSTM5	73	26
CESC	KCNE4	62	4
CESC	KREMEN2	24	11
CESC	LINC00487	3	2
CESC	NIFKP8	0	0
CESC	NUGGC	4	2
CESC	PABPC5	8	3
CESC	PDZRN3	27	6
CESC	PGC	7534	1431
CESC	PPY	2885	263
CESC	PTH	23279	3966
CESC	RAMP1	411	37
CESC	RERG	51	34
CESC	RN7SL399P	0	0
CESC	SLITRK3	11	3
CESC	SOHLH1	51	8
CESC	TBX1	584	60
CESC	TRAV14DV4	1	0
CESC	TRIM58	23	15
CESC	VSTM1	13	4
DLBC	CAPN8	18	7
DLBC	CBLC	267	31
DLBC	MUC1	4926	3934
ESCA	ADAM7	24	6
ESCA	ANKRD26P3	1	1
ESCA	C17orf64	2	1
ESCA	CCDC60	2	1
ESCA	FAM181B	3	0
ESCA	FAM81B	1	1
ESCA	ICE2P1	0	0
ESCA	KPRP	6	2
ESCA	LIN28A	293	151
ESCA	LINC01858	0	0
ESCA	LINC02343	0	0
ESCA	MRGPRD	52	6
ESCA	MYLKP1	2	2
ESCA	OR10AH1P	0	0
ESCA	PDYN-AS1	0	0
ESCA	RIMS1	122	13
ESCA	RSPH6A	6	1
ESCA	SLC22A10	8	2
ESCA	SLC25A51P3	0	0
ESCA	SLC7A9	233	4
ESCA	SSMEM1	1	0
ESCA	TMEM212	3	0
ESCA	WNT8A	238	48
HNSC	ARHGDIG	11	4
HNSC	BTBD17	1	1
HNSC	COX8C	10	2
HNSC	DHRS7C	10	1
HNSC	DNM3OS	29	17
HNSC	DPP3P2	0	0
HNSC	GUSBP6	0	0
HNSC	KLHL33	2	2
HNSC	LINC01597	0	0
HNSC	MB	79327	26692
HNSC	PCP4L1	7	1
HNSC	PROP1	300	38
HNSC	SMCO1	2	1
HNSC	TMEM238L	0	0
KIRC	HOTTIP	155	130
KIRC	RPL26P35	0	0
KIRC	TAS2R30	2	0
LAML	C2CD4C	1	0
LAML	FTH1P15	0	0
LAML	IGHJ1	2	2
LAML	MYF6	133	24
LAML	RNU6064P	0	0
LAML	RPL12P37	0	0
LAML	RPL21P120	0	0
LAML	SCD	12458	1324
LGG	C20orf85	3	3
LGG	C7orf65	1	1
LGG	DISC1FP1	6	0
LGG	KCNH5	39	11
LGG	LINC01833	0	0
LIHC	DQX1	5	1
LIHC	FBXO36P1	0	0
LIHC	HOXD11	126	31
LIHC	IL13RA2	64	32
LIHC	LINC01010	2	2
LIHC	TMC4	15	6
LUAD	ACTG1P13	0	0
LUAD	C21orf91-OT1	0	0
LUAD	C5orf66-AS2	0	0
LUAD	FER1L6	6	2
LUAD	FGF5	289	84
LUAD	GPX6	35	12
LUAD	GVINP2	0	0
LUAD	HIST1H1E	25	17
LUAD	HIST1H2AG	3	2
LUAD	HIST1H2BB	7	3
LUAD	HIST1H3A	8	5
LUAD	HIST1H3D	5	5
LUAD	HIST1H3G	4	4
LUAD	HIST2H2AB	1	1
LUAD	KLHL1	33	4
LUAD	KRT4	59	30
LUAD	LHX9	109	10
LUAD	LINC00052	15	15
LUAD	LINC02497	0	0
LUAD	LRRC53	0	0
LUAD	RBMY2AP	0	0
LUAD	RN7SKP106	0	0
LUAD	RN7SL675P	0	0
LUAD	RN7SL851P	0	0
LUAD	RNA5SP295	0	0
LUAD	RNFT1P2	0	0
LUAD	RNU1-3	0	0
LUAD	RNU6-960P	0	0
LUAD	SCN5A	2229	100
LUAD	SLC5A8	135	84
LUAD	SNORD116-27	0	0
LUAD	TAS2R62P	0	0
LUAD	TBXT	76	19
LUAD	TEX101	50	8
LUAD	TMEM196	3	2
LUAD	TRAJ37	2	0
LUAD	ZNF804B	5	0
LUSC	AADACL2	3	0
LUSC	ACSM2A	8	1
LUSC	C15orf32	4	1
LUSC	CCER1	0	0
LUSC	CHCHD2P4	0	0
LUSC	CNR2	615	106
LUSC	DDI1	66	7
LUSC	GAS2L1P2	0	0
LUSC	GLDC	126	40
LUSC	GOLGA2P9	0	0
LUSC	GUCA2A	22	14
LUSC	LINC00347	0	0
LUSC	LINC00602	1	0
LUSC	LINC00926	0	0
LUSC	LINC01492	1	1
LUSC	LINC02250	0	0
LUSC	LYPD4	2	0
LUSC	MIR7-3HG	8	6
LUSC	MIR80710	0	0
LUSC	NAT8	29	4
LUSC	PGCP1	1	0
LUSC	POU6F2-AS1	0	0
LUSC	S100P	439	384
LUSC	SLC17A2	41	5
LUSC	SMPD4P2	0	0
LUSC	SSTR2	928	602
LUSC	WFDC8	3	0
OV	ADARB2-AS1	3	3
OV	ALDH1L1-AS2	0	0
OV	BARX1-DT	0	0
OV	BEND4	4	3
OV	C10orf62	0	0
OV	C10orf71	4	3
OV	CLEC6A	6	1
OV	EGFEM1P	3	1
OV	ERVMER610	3	3
OV	FILNC1	2	2
OV	GFY	15	0
OV	GPR142	29	3
OV	GRAMD4P2	0	0
OV	HBM	1635	330
OV	HNF1B	1103	315
OV	HTR5A	38	6
OV	IFNL4	208	46
OV	IGDCC3	4	3
OV	IGHV3-48	8	6
OV	IGHV4-59	17	12
OV	IGKV102	1	0
OV	IGKV208	0	0
OV	LEFTY1	171	39
OV	LINC00189	2	2
OV	LINC00261	49	42
OV	LINC00443	3	3
OV	LINC00895	1	1
OV	LINC01405	2	1
OV	LINC01445	0	0
OV	LINC01524	1	1
OV	LINC01633	0	0
OV	LINC02038	0	0
OV	LINC02232	0	0
OV	LINC02466	0	0
OV	LINC02485	0	0
OV	LINC02489	0	0
OV	LINC02527	1	0
OV	LINC02588	0	0
OV	MIR205HG	12	9
OV	MTND1P23	0	0
OV	PPIAP45	0	0
OV	PRSS1	435	143
OV	PRSS2	185	46
OV	PURPL	3	3
OV	QRSL1P1	0	0
OV	RIPPLY2	32	3
OV	RNF186	13	2
OV	ROCR	30	3
OV	RTL1	97	14
OV	SELENOOLP	0	0
OV	SMOC1	51	12
OV	SNORD113-3	1	1
OV	SPRR2A	52	20
OV	SPRR4	8	0
OV	TDGF1	401	331
OV	XKR7	0	0
OV	ZBED1P1	0	0
OV	ZFHX4-AS1	1	1
PAAD	ARHGAP36	6	4
PAAD	C1QL2	12	3
PAAD	C1QTNF1-AS1	2	2
PAAD	JAKMIP1	20	4
PAAD	LAMB4	13	6
PAAD	PLA2G1B	74	18
PAAD	PNLIP	123	18
PAAD	PTPRD-AS2	0	0
PAAD	SPIB	163	73
PAAD	TMPRSS15	4	2
PAAD	WNK4	392	15
